# Supplementary material for: Signatures of selection and genomic diversity of Muskellunge (Esox masquinongy) from two populations in North America.
Source: Research Square preprint supplement (doi:10.21203/rs.3.rs-264701/v1), 2021-02-26
Supplement: Supplementary file 5 [file 590998654b60683ccc12998f.xlsx]

## Sheet: mart_export (1)
	Signatures of selection and genomic diversity of Muskellunge (Esox masquinongy) from two populations in North America.
	Josue Chinchilla-Vargas1*, Max F. Rothschild1 , Francesca Bertolini2.
	1 Iowa State University, Department of Animal Science, Ames, Iowa, 50011.
	2 National Institute of Aquatic Resources, Technical University of Denmark, 2800, KGs. Lyngby, Denmark
	Supplementary Table 1. Annotated genes located in windows found significant in pooled heterozygosity analyses.
	Gene name	Gene description	Chromosome	Gene start (bp)
	PPARG	peroxisome proliferator-activated receptor gamma [Source:NCBI gene;Acc:105013043]	2	199500
	tsen2	tRNA splicing endonuclease subunit 2 [Source:NCBI gene;Acc:105013054]	2	263483
	mkrn2	makorin ring finger protein 2 [Source:NCBI gene;Acc:105013060]	2	294423
	raf1b	Raf-1 proto-oncogene, serine/threonine kinase [Source:NCBI gene;Acc:105013076]	2	318819
	cnbpb	CCHC-type zinc finger nucleic acid binding protein [Source:NCBI gene;Acc:105013083]	2	365194
	isy1	ISY1 splicing factor homolog [Source:NCBI gene;Acc:105013103]	2	386837
	zgc:77375	haloacid dehalogenase-like hydrolase domain-containing 5 [Source:NCBI gene;Acc:105013113]	2	400963
	rab43	RAB43, member RAS oncogene family [Source:NCBI gene;Acc:105013124]	2	419887
	nuf2	UF2 component of NDC80 kinetochore complex [Source:NCBI gene;Acc:393280]	2	423635
	efcc1	EF-hand and coiled-coil domain containing 1 [Source:NCBI gene;Acc:105013136]	2	433320
	cacnb2b	calcium channel, voltage-dependent, beta 2b [Source:ZFIN;Acc:ZDB-GENE-050208-129]	3	24401
	si:dkey-32m20.1	transmembrane protein 236 [Source:NCBI gene;Acc:105030192]	3	59909
	stam	signal transducing adaptor molecule [Source:NCBI gene;Acc:105030193]	3	71732
	clul1	clusterin-like protein 1 [Source:NCBI gene;Acc:105030195]	3	124782
	adcyap1b	glucagon family neuropeptides [Source:NCBI gene;Acc:105030196]	3	152142
	emilin2a	EMILIN-2 [Source:NCBI gene;Acc:105030198]	3	243954
	lpin2	lipin 2 [Source:ZFIN;Acc:ZDB-GENE-060503-153]	3	272602
	myom1a	myomesin 1a (skelemin) [Source:ZFIN;Acc:ZDB-GENE-030131-2856]	3	317132
	bag1	BAG cochaperone 1 [Source:NCBI gene;Acc:105007713]	3	373993
	chmp5a	charged multivesicular body protein 5 [Source:NCBI gene;Acc:105007712]	3	391776
	oprk1	delta-type opioid receptor-like [Source:NCBI gene;Acc:105007147]	3	412131
	atp6v1h	ATPase H+ transporting V1 subunit H [Source:NCBI gene;Acc:105007143]	3	430192
	rgs20	regulator of G-protein signaling 20 [Source:NCBI gene;Acc:105007144]	3	472460
	sh2d1ab	SH2 domain containing 1A duplicate b [Source:ZFIN;Acc:ZDB-GENE-091204-326]	4	27411
	SH3BGRL	SH3 domain binding glutamate rich protein like [Source:NCBI gene;Acc:105007782]	4	365748
	TBX22	T-box transcription factor 22 [Source:NCBI gene;Acc:105007239]	4	447612
	tent5d	uncharacterized LOC105026969 [Source:NCBI gene;Acc:105026969]	7	31760094
	sh3bgrl	SH3 domain-binding glutamic acid-rich-like protein [Source:NCBI gene;Acc:109614642]	7	31821004
	shank3b	SH3 and multiple ankyrin repeat domains 3b [Source:ZFIN;Acc:ZDB-GENE-041210-74]	14	10400
	hspa14	heat shock protein 14 [Source:NCBI gene;Acc:565232]	14	160520
	dclre1c	DNA cross-link repair 1C [Source:NCBI gene;Acc:105015375]	14	173391
	meig1	meiosis/spermiogenesis associated 1 [Source:NCBI gene;Acc:105015368]	14	181688
	tmem243b	transmembrane protein 243 [Source:NCBI gene;Acc:105015369]	14	186480
	dmtf1	cyclin D binding myb-like transcription factor 1 [Source:NCBI gene;Acc:436938]	14	198857
	cwf19l1	CWF19 like cell cycle control factor 1 [Source:NCBI gene;Acc:105015373]	14	221913
	cd9b	CD9 antigen [Source:NCBI gene;Acc:105015366]	14	249742
	ano2b	anoctamin-1 [Source:NCBI gene;Acc:105015365]	14	286330
	ntf3	neurotrophin 3 [Source:NCBI gene;Acc:109614653]	14	406864
	gls2b	glutaminase kidney isoform, mitochondrial [Source:NCBI gene;Acc:105007068]	17	55800
	rdh5	retinol dehydrogenase 5 (11-cis/9-cis) [Source:ZFIN;Acc:ZDB-GENE-050208-411]	17	112220
	bloc1s1	biogenesis of lysosomal organelles complex 1 subunit 1 [Source:NCBI gene;Acc:105007070]	17	132917
	ITGA7	integrin subunit alpha 7 [Source:NCBI gene;Acc:105006268]	17	166171
	dnase1l4.1	deoxyribonuclease 1 like 4, tandem duplicate 1 [Source:ZFIN;Acc:ZDB-GENE-040808-35]	17	267634
	ccdc51	coiled-coil domain containing 51 [Source:ZFIN;Acc:ZDB-GENE-060825-200]	17	276545
	mcm2	minichromosome maintenance complex component 2 [Source:ZFIN;Acc:ZDB-GENE-020419-24]	17	281847
	zgc:171566	zgc:171566 [Source:ZFIN;Acc:ZDB-GENE-050309-193]	17	308307
	lsm3	Esox lucius LSM3 homolog, U6 small nuclear RNA and mRNA degradation associated (lsm3), mRNA. [Source:RefSeq mRNA;Acc:NM_001304105]	17	338809
	RGS20	regulator of G-protein signaling 20-like [Source:NCBI gene;Acc:105019398]	21	24223913
	OPRK1	delta-type opioid receptor [Source:NCBI gene;Acc:105008246]	21	24315737
	LPIN2	lipin 2 [Source:HGNC Symbol;Acc:HGNC:14450]	21	24491168
	CLUL1	clusterin like 1 [Source:HGNC Symbol;Acc:HGNC:2096]	21	24890920
