# Supplementary material for: Signatures of selection and genomic diversity of Muskellunge (Esox masquinongy) from two populations in North America.
Source: Research Square preprint supplement (doi:10.21203/rs.3.rs-264701/v1), 2021-02-26
Supplement: Supplementary file 6 [file 699af8ebb65b9c1b32d6ab22.xlsx]

## Sheet: GO_Biological_Process_2018_tabl
	Signatures of selection and genomic diversity of Muskellunge (Esox masquinongy) from two populations in North America.
	Josue Chinchilla-Vargas1*, Max F. Rothschild1 , Francesca Bertolini2.
	1 Iowa State University, Department of Animal Science, Ames, Iowa, 50011.
	2 National Institute of Aquatic Resources, Technical University of Denmark, 2800, KGs. Lyngby, Denmark
	Supplementary Table 2. List of enriched GO terms related to Hp analyses shown in Supplementary Table 2
	Term	nominal P-value	Adjusted P-value	Genes related to GO term
	sensory perception of pain (GO:0019233)	0.000176767	0.0346464	oprk1;adcyap1b
	sensory perception (GO:0007600)	0.00117623	0.0768473	oprk1;adcyap1b
	positive regulation of synaptic transmission, glutamatergic (GO:0051968)	0.00117623	0.0768473	shank3b;adcyap1b
	regulation of oligodendrocyte progenitor proliferation (GO:0070445)	0.0152047	0.0941295	adcyap1b
	cytoplasmic mRNA processing body assembly (GO:0033962)	0.0152047	0.0941295	lsm3
	regulation of glial cell proliferation (GO:0060251)	0.0177167	0.0941295	adcyap1b
	tRNA splicing, via endonucleolytic cleavage and ligation (GO:0006388)	0.0177167	0.0941295	tsen2
	pituitary gland development (GO:0021983)	0.0152047	0.0941295	adcyap1b
	positive regulation of excitatory postsynaptic potential (GO:2000463)	0.0152047	0.0941295	shank3b
	regulation of G-protein coupled receptor protein signaling pathway (GO:0008277)	0.0152047	0.0941295	adcyap1b
	positive regulation of neural retina development (GO:0061075)	0.0152047	0.0941295	atp6v1h
	positive regulation of peptide hormone secretion (GO:0090277)	0.0152047	0.0941295	adcyap1b
	modulation of excitatory postsynaptic potential (GO:0098815)	0.0152047	0.0941295	shank3b
	purine ribonucleoside monophosphate metabolic process (GO:0009167)	0.0202224	0.0941295	adcyap1b
	positive regulation of synaptic transmission (GO:0050806)	0.00444764	0.0941295	shank3b;adcyap1b
	spliceosomal conformational changes to generate catalytic conformation (GO:0000393)	0.0152047	0.0941295	isy1
	ATP metabolic process (GO:0046034)	0.0177167	0.0941295	adcyap1b
	regulation of cAMP-mediated signaling (GO:0043949)	0.0177167	0.0941295	adcyap1b
	regulation of potassium ion transport (GO:0043266)	0.0202224	0.0941295	adcyap1b
	regulation of gliogenesis (GO:0014013)	0.025215	0.0941295	adcyap1b
	postsynaptic density assembly (GO:0097107)	0.0152047	0.0941295	shank3b
	excitatory synapse assembly (GO:1904861)	0.0152047	0.0941295	shank3b
	postsynaptic density organization (GO:0097106)	0.0152047	0.0941295	shank3b
	postsynaptic specialization assembly (GO:0098698)	0.0152047	0.0941295	shank3b
	negative regulation of potassium ion transport (GO:0043267)	0.0152047	0.0941295	adcyap1b
	cellular response to glucocorticoid stimulus (GO:0071385)	0.0152047	0.0941295	adcyap1b
	dendritic spine morphogenesis (GO:0060997)	0.0202224	0.0941295	shank3b
	nerve growth factor signaling pathway (GO:0038180)	0.0177167	0.0941295	ntf3
	positive regulation of cytokine production (GO:0001819)	0.025215	0.0941295	adcyap1b
	peptide hormone secretion (GO:0030072)	0.0202224	0.0941295	adcyap1b
	chromosome organization (GO:0051276)	0.0301826	0.0941295	nuf2
	regulation of cation channel activity (GO:2001257)	0.00301117	0.0941295	shank3b;cacnb2b
	regulation of calcium ion transmembrane transporter activity (GO:1901019)	0.0227218	0.0941295	cacnb2b
	response to glucocorticoid (GO:0051384)	0.025215	0.0941295	adcyap1b
	regulation of voltage-gated calcium channel activity (GO:1901385)	0.0301826	0.0941295	cacnb2b
	interstrand cross-link repair (GO:0036297)	0.0277019	0.0941295	dclre1c
	neurotrophin signaling pathway (GO:0038179)	0.0177167	0.0941295	ntf3
	positive regulation of dendritic spine development (GO:0060999)	0.0227218	0.0941295	shank3b
	telomere capping (GO:0016233)	0.0202224	0.0941295	dclre1c
	regulation of synaptic transmission, glutamatergic (GO:0051966)	0.00422642	0.0941295	shank3b;adcyap1b
	regulation of blood vessel diameter (GO:0097746)	0.0202224	0.0941295	adcyap1b
	purine ribonucleotide metabolic process (GO:0009150)	0.0301826	0.0941295	adcyap1b
	non-recombinational repair (GO:0000726)	0.0326572	0.0941295	dclre1c
	positive regulation of cell projection organization (GO:0031346)	0.0277019	0.0941295	adcyap1b
	negative regulation of ion transport (GO:0043271)	0.0277019	0.0941295	adcyap1b
	attachment of mitotic spindle microtubules to kinetochore (GO:0051315)	0.0177167	0.0941295	nuf2
	positive regulation of dendrite development (GO:1900006)	0.025215	0.0941295	shank3b
	double-strand break repair via nonhomologous end joining (GO:0006303)	0.0326572	0.0941295	dclre1c
	DNA-templated transcription, initiation (GO:0006352)	0.0326572	0.0941295	dmtf1
	dendritic spine organization (GO:0097061)	0.0227218	0.0941295	shank3b
	cellular response to nerve growth factor stimulus (GO:1990090)	0.0301826	0.0941295	ntf3
	regulation of neural retina development (GO:0061074)	0.0301826	0.0941295	atp6v1h
	regulation of protein localization (GO:0032880)	0.0277019	0.0941295	adcyap1b
	DNA-templated transcription, termination (GO:0006353)	0.0277019	0.0941295	dmtf1
	glycerophospholipid biosynthetic process (GO:0046474)	0.0326572	0.0941295	zgc:77375
	response to alcohol (GO:0097305)	0.0301826	0.0941295	adcyap1b
	positive regulation of cell-substrate adhesion (GO:0010811)	0.0301826	0.0941295	emilin2a
	folic acid-containing compound metabolic process (GO:0006760)	0.0326572	0.0941295	zgc:171566
	response to ethanol (GO:0045471)	0.0301826	0.0941295	adcyap1b
	response to unfolded protein (GO:0006986)	0.0277019	0.0941295	hspa14
	cellular response to unfolded protein (GO:0034620)	0.0277019	0.0941295	hspa14
	mitotic metaphase plate congression (GO:0007080)	0.0301826	0.0941295	nuf2
	cellular response to topologically incorrect protein (GO:0035967)	0.0326572	0.0941295	hspa14
	neuron projection development (GO:0031175)	0.00292804	0.0941295	ntf3;shank3b;adcyap1b
	regulation of cell-substrate adhesion (GO:0010810)	0.0277019	0.0941295	emilin2a
	positive regulation of cell adhesion (GO:0045785)	0.0301826	0.0941295	emilin2a
	neuropeptide signaling pathway (GO:0007218)	0.0126821	0.0941295	oprk1;adcyap1b
	ribonucleoprotein complex assembly (GO:0022618)	0.0284322	0.0941295	isy1;lsm3
	regulation of dendritic spine development (GO:0060998)	0.0351255	0.0969662	shank3b
	glycerophospholipid metabolic process (GO:0006650)	0.0351255	0.0969662	zgc:77375
	long-term synaptic potentiation (GO:0060291)	0.0351255	0.0969662	shank3b
	regulation of neural precursor cell proliferation (GO:2000177)	0.0375876	0.102322	adcyap1b
	neuron projection morphogenesis (GO:0048812)	0.038177	0.102503	ntf3;shank3b
	microtubule cytoskeleton organization involved in mitosis (GO:1902850)	0.0424935	0.11255	nuf2
	synapse assembly (GO:0007416)	0.0449372	0.115891	shank3b
	chaperone mediated protein folding requiring cofactor (GO:0051085)	0.0449372	0.115891	hspa14
	thymus development (GO:0048538)	0.0473748	0.117538	mcm2
	photoreceptor cell differentiation (GO:0046530)	0.0473748	0.117538	rdh5
	'de novo' posttranslational protein folding (GO:0051084)	0.0473748	0.117538	hspa14
	dendrite morphogenesis (GO:0048813)	0.0498063	0.117615	shank3b
	negative regulation of neuron apoptotic process (GO:0043524)	0.0498063	0.117615	ntf3
	bone development (GO:0060348)	0.0498063	0.117615	atp6v1h
	phospholipid biosynthetic process (GO:0008654)	0.0498063	0.117615	zgc:77375
	negative regulation of cell death (GO:0060548)	0.0522317	0.117671	ntf3
	mRNA splice site selection (GO:0006376)	0.0522317	0.117671	isy1
	cellular response to heat (GO:0034605)	0.0522317	0.117671	hspa14
	regulation of postsynaptic membrane potential (GO:0060078)	0.0522317	0.117671	adcyap1b
	regulation of AMPA receptor activity (GO:2000311)	0.0546511	0.11771	shank3b
	posterior lateral line system development (GO:0048915)	0.0546511	0.11771	cd9b
	negative regulation of neuron death (GO:1901215)	0.0546511	0.11771	ntf3
	myosin filament assembly (GO:0031034)	0.0546511	0.11771	myom1a
	regulation of glutamate receptor signaling pathway (GO:1900449)	0.0570644	0.117733	shank3b
	regulation of neurotransmitter receptor activity (GO:0099601)	0.0570644	0.117733	shank3b
	regulation of protein kinase activity (GO:0045859)	0.0570644	0.117733	adcyap1b
	cardiac muscle fiber development (GO:0048739)	0.0570644	0.117733	myom1a
	negative regulation of hydrolase activity (GO:0051346)	0.0594716	0.121421	adcyap1b
	skeletal muscle myosin thick filament assembly (GO:0030241)	0.0618729	0.123746	myom1a
	skeletal muscle thin filament assembly (GO:0030240)	0.0618729	0.123746	myom1a
	striated muscle myosin thick filament assembly (GO:0071688)	0.0642681	0.127238	myom1a
	positive regulation of neuron projection development (GO:0010976)	0.0666573	0.130648	adcyap1b
	negative regulation of cell cycle (GO:0045786)	0.0690405	0.131378	adcyap1b
	positive regulation of neuron differentiation (GO:0045666)	0.0690405	0.131378	adcyap1b
	brain morphogenesis (GO:0048854)	0.0690405	0.131378	shank3b
	regulation of neuron projection development (GO:0010975)	0.0714178	0.133313	adcyap1b
	cardiac muscle tissue morphogenesis (GO:0055008)	0.0714178	0.133313	myom1a
	neuromuscular junction development (GO:0007528)	0.0737891	0.13644	cacnb2b
	muscle tissue morphogenesis (GO:0060415)	0.0761545	0.138206	myom1a
	protein complex subunit organization (GO:0071822)	0.0761545	0.138206	nuf2
	regulation of neuron apoptotic process (GO:0043523)	0.078514	0.141181	ntf3
	cytoplasmic translation (GO:0002181)	0.0808675	0.141518	hspa14
	mitotic spindle organization (GO:0007052)	0.0808675	0.141518	nuf2
	skeletal myofibril assembly (GO:0014866)	0.0808675	0.141518	myom1a
	peripheral nervous system development (GO:0007422)	0.0832152	0.141828	ntf3
	cardiac myofibril assembly (GO:0055003)	0.0832152	0.141828	myom1a
	gland development (GO:0048732)	0.0830861	0.141828	mcm2;adcyap1b
	MAPK cascade (GO:0000165)	0.085557	0.144562	raf1b
	plasma membrane bounded cell projection morphogenesis (GO:0120039)	0.0925472	0.154947	ntf3
	negative regulation of cell proliferation (GO:0008285)	0.0948656	0.154947	adcyap1b
	positive regulation of hydrolase activity (GO:0051345)	0.0948656	0.154947	adcyap1b
	eye morphogenesis (GO:0048592)	0.0948656	0.154947	rdh5
	RNA processing (GO:0006396)	0.0971782	0.156122	tsen2
	striated muscle contraction (GO:0006941)	0.0971782	0.156122	myom1a
	eye photoreceptor cell differentiation (GO:0001754)	0.099485	0.158339	rdh5
	endocrine system development (GO:0035270)	0.101786	0.158339	adcyap1b
	nervous system development (GO:0007399)	0.100188	0.158339	ntf3;shank3b
	brain development (GO:0007420)	0.101789	0.158339	shank3b;adcyap1b
	regulation of neuron differentiation (GO:0045664)	0.108655	0.166377	ntf3
	cardiac muscle cell development (GO:0055013)	0.108655	0.166377	myom1a
	lateral line development (GO:0048882)	0.110933	0.168549	cd9b
	cAMP-mediated signaling (GO:0019933)	0.115472	0.174096	adcyap1b
	posterior lateral line development (GO:0048916)	0.117733	0.174815	cd9b
	cardiac muscle tissue development (GO:0048738)	0.117733	0.174815	myom1a
	sarcomere organization (GO:0045214)	0.122238	0.18014	myom1a
	enzyme linked receptor protein signaling pathway (GO:0007167)	0.128953	0.18722	ntf3
	regulation of cell communication (GO:0010646)	0.128953	0.18722	ntf3
	muscle contraction (GO:0006936)	0.13118	0.187674	myom1a
	regulation of GTPase activity (GO:0043087)	0.13118	0.187674	adcyap1b
	positive regulation of signal transduction (GO:0009967)	0.135618	0.192616	shank3b
	positive regulation of protein kinase activity (GO:0045860)	0.150975	0.212885	adcyap1b
	plasma membrane bounded cell projection organization (GO:0120036)	0.153147	0.212885	adcyap1b
	double-strand break repair (GO:0006302)	0.153147	0.212885	dclre1c
	RNA splicing, via transesterification reactions with bulged adenosine as nucleophile (GO:0000377)	0.157475	0.215839	lsm3
	negative regulation of apoptotic process (GO:0043066)	0.157153	0.215839	ntf3;adcyap1b
	modulation of chemical synaptic transmission (GO:0050804)	0.161781	0.220201	ntf3
	positive regulation of GTPase activity (GO:0043547)	0.170328	0.230236	adcyap1b
	regulation of neurogenesis (GO:0050767)	0.172451	0.23151	ntf3
	positive regulation of kinase activity (GO:0033674)	0.174569	0.232759	adcyap1b
	camera-type eye development (GO:0043010)	0.176682	0.233984	adcyap1b
	adenylate cyclase-activating G-protein coupled receptor signaling pathway (GO:0007189)	0.182989	0.24071	adcyap1b
	ER to Golgi vesicle-mediated transport (GO:0006888)	0.189248	0.247284	rab43
	Rab protein signal transduction (GO:0032482)	0.191324	0.248341	rab43
	negative regulation of cellular process (GO:0048523)	0.199575	0.250749	adcyap1b
	mRNA processing (GO:0006397)	0.19752	0.250749	lsm3
	muscle fiber development (GO:0048747)	0.19752	0.250749	myom1a
	positive regulation of cytosolic calcium ion concentration (GO:0007204)	0.199575	0.250749	adcyap1b
	endosomal transport (GO:0016197)	0.19752	0.250749	bloc1s1
	myofibril assembly (GO:0030239)	0.20367	0.254263	myom1a
	positive regulation of cell proliferation (GO:0008284)	0.207745	0.257708	adcyap1b
	regulation of cytosolic calcium ion concentration (GO:0051480)	0.213818	0.263574	adcyap1b
	actomyosin structure organization (GO:0031032)	0.221844	0.271759	myom1a
	regulation of programmed cell death (GO:0043067)	0.223838	0.272499	ntf3
	positive regulation of intracellular signal transduction (GO:1902533)	0.227812	0.274628	adcyap1b
	translation (GO:0006412)	0.229791	0.274628	hspa14
	heart morphogenesis (GO:0003007)	0.229791	0.274628	myom1a
	positive regulation of cellular process (GO:0048522)	0.231765	0.275308	adcyap1b
	positive regulation of ERK1 and ERK2 cascade (GO:0070374)	0.235698	0.278294	adcyap1b
	mRNA splicing, via spliceosome (GO:0000398)	0.243506	0.285791	lsm3
	positive regulation of MAPK cascade (GO:0043410)	0.24738	0.286902	adcyap1b
	regulation of ERK1 and ERK2 cascade (GO:0070372)	0.24738	0.286902	adcyap1b
	actin filament organization (GO:0007015)	0.258887	0.295011	myom1a
	adenylate cyclase-modulating G-protein coupled receptor signaling pathway (GO:0007188)	0.258887	0.295011	adcyap1b
	eye development (GO:0001654)	0.258887	0.295011	adcyap1b
	Golgi vesicle transport (GO:0048193)	0.273961	0.310384	rab43
	transmembrane receptor protein tyrosine kinase signaling pathway (GO:0007169)	0.279536	0.31488	ntf3
	neuron development (GO:0048666)	0.292382	0.327468	adcyap1b
	skeletal system development (GO:0001501)	0.296011	0.329649	atp6v1h
	DNA repair (GO:0006281)	0.303214	0.335762	dclre1c
	positive regulation of protein phosphorylation (GO:0001934)	0.322652	0.355279	adcyap1b
	G-protein coupled receptor signaling pathway, coupled to cyclic nucleotide second messenger (GO:0007187)	0.326128	0.357101	oprk1
	Ras protein signal transduction (GO:0007265)	0.33131	0.36076	rab43
	anterograde trans-synaptic signaling (GO:0098916)	0.33986	0.368025	cacnb2b
	regulation of signal transduction (GO:0009966)	0.373001	0.401694	adcyap1b
	regulation of cell proliferation (GO:0042127)	0.384211	0.411505	adcyap1b
	chemical synaptic transmission (GO:0007268)	0.393663	0.419336	cacnb2b
	circulatory system development (GO:0072359)	0.419677	0.44463	nuf2
	negative regulation of programmed cell death (GO:0043069)	0.484705	0.510764	ntf3
	intracellular protein transport (GO:0006886)	0.488688	0.512208	rab43
	protein transport (GO:0015031)	0.491327	0.512234	rab43
	central nervous system development (GO:0007417)	0.49526	0.513603	adcyap1b
	regulation of cell cycle (GO:0051726)	0.500458	0.516262	adcyap1b
	cellular protein localization (GO:0034613)	0.504322	0.517524	rab43
	organelle assembly (GO:0070925)	0.546117	0.557495	lsm3
	heart development (GO:0007507)	0.551965	0.560544	nuf2
	positive regulation of transcription from RNA polymerase II promoter (GO:0045944)	0.574625	0.580549	adcyap1b
	positive regulation of transcription, DNA-templated (GO:0045893)	0.646354	0.649668	adcyap1b
	regulation of transcription from RNA polymerase II promoter (GO:0006357)	0.868152	0.868152	adcyap1b
