# Supplementary material for: Signatures of selection and genomic diversity of Muskellunge (Esox masquinongy) from two populations in North America.
Source: Research Square preprint supplement (doi:10.21203/rs.3.rs-264701/v1), 2021-02-26
Supplement: Supplementary file 7 [file b6c10dd7b1e30cb44e201d2f.xlsx]

## Sheet: Sheet1
	Signatures of selection and genomic diversity of Muskellunge (Esox masquinongy) from two populations in North America.
	Josue Chinchilla-Vargas1*, Max F. Rothschild1 , Francesca Bertolini2.
	1 Iowa State University, Department of Animal Science, Ames, Iowa, 50011.
	2 National Institute of Aquatic Resources, Technical University of Denmark, 2800, KGs. Lyngby, Denmark
	Supplementary Table 4. List of enriched GO terms related to Fst analyses.
	Term	Nominal P-value	Adjusted P-value	Genes related to GO term
	negative regulation of developmental process (GO:0051093)	0.00039515	0.232348	tcf7l1a;loxl2b;march5l;loxl2a
	positive regulation of chondrocyte differentiation (GO:0032332)	0.00369938	0.416846	loxl2b;loxl2a
	negative regulation of multicellular organismal process (GO:0051241)	0.00407578	0.416846	tcf7l1a;loxl2b;loxl2a
	positive regulation of cartilage development (GO:0061036)	0.00488835	0.416846	loxl2b;loxl2a
	negative regulation of transcription from RNA polymerase II promoter (GO:0000122)	0.00601902	0.416846	drap1;loxl2b;loxl2a;suds3;cica;mta2;tcf25;rela
	lipoprotein biosynthetic process (GO:0042158)	0.00622883	0.416846	wdr45;atg10
	negative regulation of transcription, DNA-templated (GO:0045892)	0.00754068	0.416846	drap1;stc1l;men1;loxl2b;loxl2a;suds3;cica;mta2;tcf25;rela
	peptidyl-lysine oxidation (GO:0018057)	0.0077165	0.416846	loxl2b;loxl2a
	regulation of epithelial to mesenchymal transition (GO:0010717)	0.0077165	0.416846	loxl2b;loxl2a
	hemangioblast cell differentiation (GO:0060217)	0.0077165	0.416846	snrkb;aggf1
	peptidyl-lysine modification (GO:0018205)	0.0100438	0.416846	loxl2b;uba2;loxl2a
	regulation of chondrocyte differentiation (GO:0032330)	0.0111166	0.416846	loxl2b;loxl2a
	positive regulation of developmental growth (GO:0048639)	0.0130209	0.416846	nsmfb;tnc
	epithelial to mesenchymal transition (GO:0001837)	0.0130209	0.416846	loxl2b;loxl2a
	neuron projection fasciculation (GO:0106030)	0.0130209	0.416846	robo2;tnc
	negative regulation of Wnt signaling pathway (GO:0030178)	0.0145001	0.416846	znrf3;sfrp1a;tollip;tcf7l1a
	leukocyte differentiation (GO:0002521)	0.015056	0.416846	ak2;irf8
	mesodermal cell differentiation (GO:0048333)	0.015056	0.416846	snrkb;aggf1
	axonal fasciculation (GO:0007413)	0.017218	0.416846	robo2;tnc
	epithelial cell migration (GO:0010631)	0.0195031	0.416846	loxl2b;loxl2a
	ncRNA processing (GO:0034470)	0.0205757	0.416846	pop7;imp4;pih1d1
	endothelial cell migration (GO:0043542)	0.0219077	0.416846	loxl2b;loxl2a
	regulation of MAP kinase activity (GO:0043405)	0.024428	0.416846	trib3;pdgfd
	response to alkaloid (GO:0043279)	0.0270605	0.416846	chrnb1l;chrnb1
	response to nicotine (GO:0035094)	0.0270605	0.416846	chrnb1l;chrnb1
	positive regulation of multicellular organismal process (GO:0051240)	0.0270605	0.416846	loxl2b;loxl2a
	negative regulation of cellular protein metabolic process (GO:0032269)	0.0270605	0.416846	fxr2;cnot3b
	negative regulation of cellular amide metabolic process (GO:0034249)	0.0298018	0.416846	fxr2;cnot3b
	transcription, DNA-templated (GO:0006351)	0.0320921	0.416846	xbp1;mef2ca;taf6l
	negative regulation of canonical Wnt signaling pathway (GO:0090090)	0.0320921	0.416846	znrf3;sfrp1a;tcf7l1a
	regulation of RNA splicing (GO:0043484)	0.0326483	0.416846	srrm4;usb1
	mesenchymal cell differentiation (GO:0048762)	0.0326483	0.416846	loxl2b;loxl2a
	regulation of AMPA receptor activity (GO:2000311)	0.0355967	0.416846	shisa7b;cacng7a
	histone deacetylation (GO:0016575)	0.0355967	0.416846	suds3;mta2
	synaptic transmission, cholinergic (GO:0007271)	0.0386438	0.416846	chrnb1l;chrnb1
	regulation of glutamate receptor signaling pathway (GO:1900449)	0.0386438	0.416846	shisa7b;cacng7a
	regulation of neurotransmitter receptor activity (GO:0099601)	0.0386438	0.416846	shisa7b;cacng7a
	collagen fibril organization (GO:0030199)	0.0386438	0.416846	loxl2b;loxl2a
	canonical Wnt signaling pathway (GO:0060070)	0.0388754	0.416846	sfrp1a;tcf7l1a;lrp5
	negative regulation of cellular macromolecule biosynthetic process (GO:2000113)	0.03945	0.416846	fxr2;stc1l;men1;loxl2b;cnot3b
	cellular metal ion homeostasis (GO:0006875)	0.0406761	0.416846	stim1a;stc1l;atp1a3a
	protein deacetylation (GO:0006476)	0.0417864	0.416846	suds3;mta2
	neuromuscular synaptic transmission (GO:0007274)	0.0417864	0.416846	chrnb1l;chrnb1
